# Supplementary material for: Preparation of biocompatible and antibacterial carbon quantum dots derived from resorcinol and formaldehyde spheres
Source: Royal Society of Chemistry journal article supplement (doi:10.1039/c5ra01506e), 2015-01-01
Supplement: c5ra01506e1.pdf [file c5ra01506e1.pdf]

## Supporting Information

# Preparation of biocompatible and antibacterial carbon quantum dots derived from resorcinol and formaldehyde spheres

Arup Kumer Roy,<sup>a</sup> Sung-Min Kim,<sup>b</sup> Peerasak Paoprasert,<sup>c</sup> Sung-Young Park,<sup>b,d\*</sup> and Insik In<sup>a,d\*</sup>

<sup>a</sup>Department of Polymer Science and Engineering, Korea National University of Transportation, Chungju 380-702, South Korea.

<sup>b</sup>Department of Chemical and Biological Engineering, Korea National University of Transportation, Chungju 380-702, South Korea.

<sup>c</sup>Department of Chemistry, Faculty of Science and Technology, Thammasat University, Pathumthani 12121, Thailand.

<sup>d</sup>Department of IT Convergence, Korea National University of Transportation, Chungju 380-702, South Korea.

### Experimental Section:

#### *In vitro* imaging and evaluation of cellular uptake:

Cells incubation with CQD-S and CQD-P was analyzed by confocal imaging. A549 lung cancer cells were plated over a cover slide on an eight-well plate at a density of  $1 \times 10^5$  cells per well, and were incubated for 24 hrs at 37 °C in a humidified 5% CO<sub>2</sub> atmosphere. The cells were treated for 2 hrs with the CQDs at 0.01 mg mL<sup>-1</sup> in fresh culture media. The cells were then washed with PBS several times to remove the unbound composite materials. The cells were fixed using 4% (w/v) formaldehyde solution in PBS, after which they were examined using an LSM510 confocal laser-scanning microscope (Carl Zeiss, Germany). For CQD-S, excitation was carried out at 488 nm with an emission filter of 505 nm; for CQD-P, excitation was at 488 nm with an emission filter of 530 nm. During all investigations, the  $\times 20$  objective lens was used.

#### Preparation for Antibacterial activity by “Kirby-Bauer” methods:

The stock solutions of *E. coli* (Gram negative, strain ATCC 25922) and *Staphylococcus aureus* (Gram positive, strain ATCC 25424) were prepared in a LB broth and MRS broth (50 ml). After incubation at 37 °C for 12 hrs, the bacterial concentration of the suspension was  $1 \times 10^5$  cells in peptone solution. After that, a single layer of solid medium was created upon which bacterial suspension was poured in a petri dish. Then solution of CQD-S/Ag NPs and CQD-P/Ag NPs were drop-wisely added. The treated bacterial were incubated for 24 hrs at 37 °C. Inhibition zone were carefully measured after 24 hrs of incubation at 37 °C to evaluate antibacterial activities. The experiments were repeated three times, and the average values of antibacterial activity were calculated.

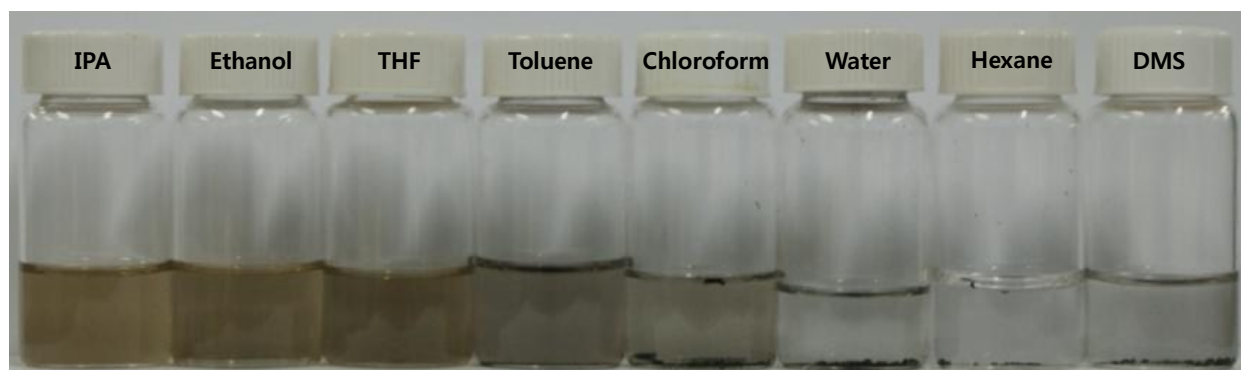

**Fig. S1** Solubility test of carbon sphere (CS) in different solvent media.

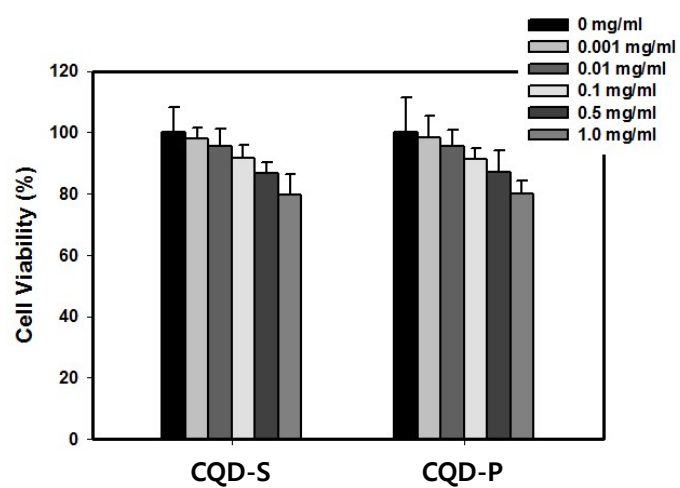

**Fig. S2** MTT assay for in vitro cytotoxicity measurement of CQD-S and CQD-P, after 24 h of incubation with A549 cells.

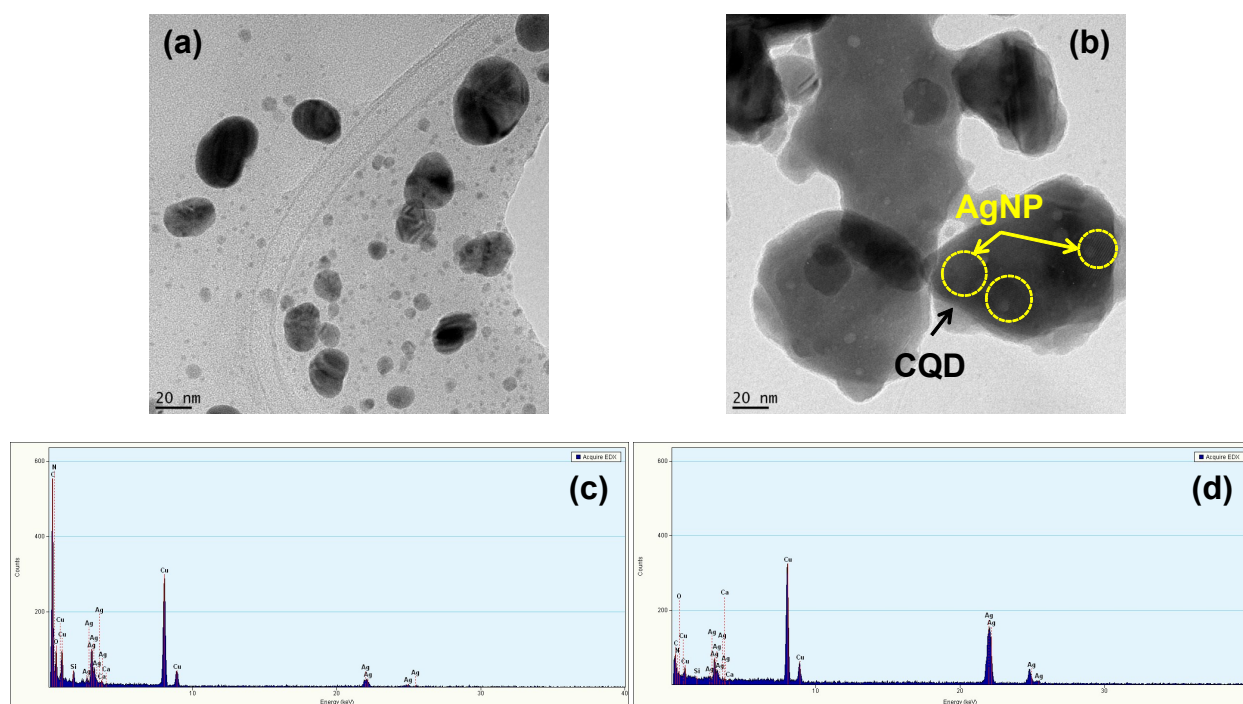

**Fig. S3** TEM images and EDX analysis of (a) and (c) CQD-S/Ag NP and (b) and (d) CQD-P/Ag NP.

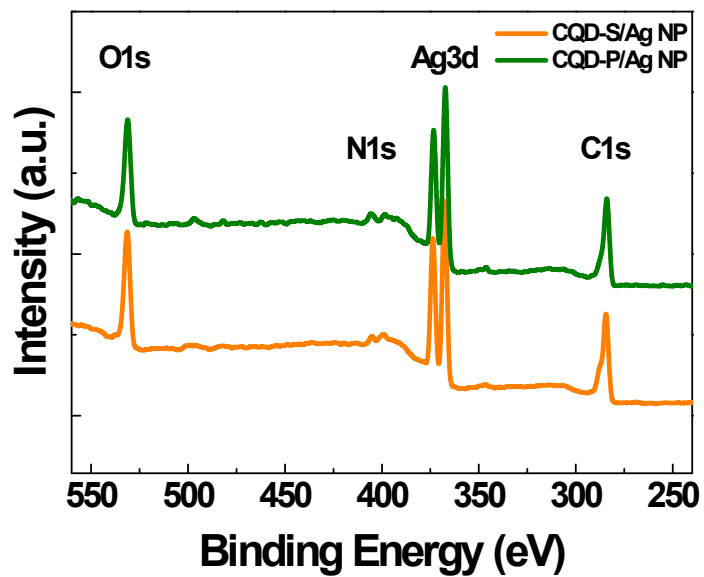

**Fig. S4** XPS full survey scans of both CQD-S/Ag NP and CQD-P/Ag NP.

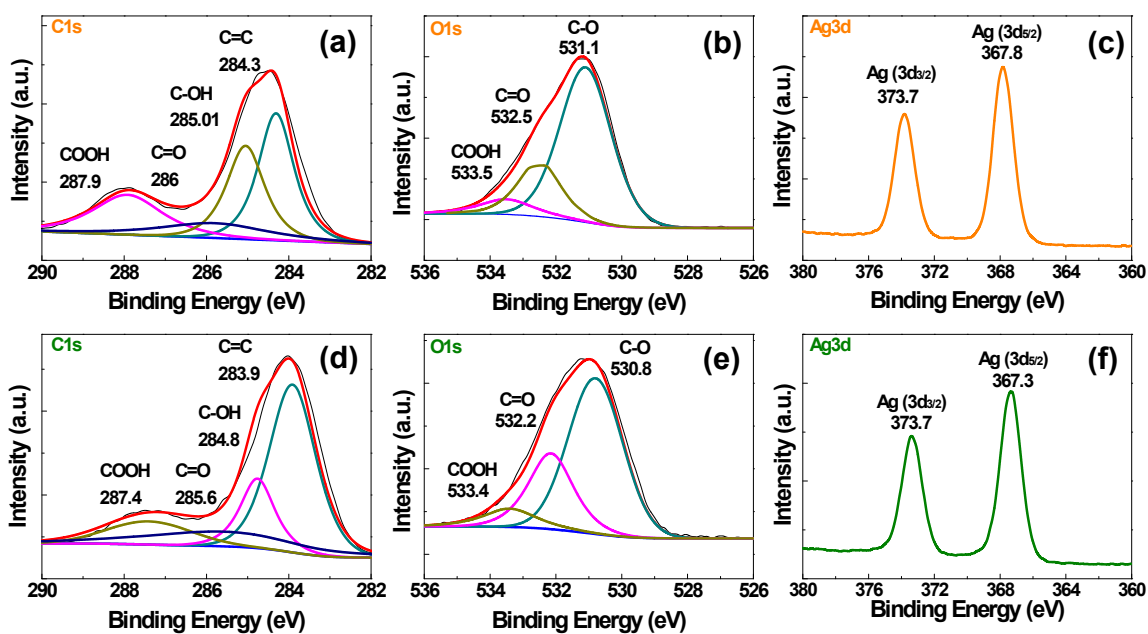

Fig. S5 XPS Spectrum of C1s, O1s and Ag3d peaks of both (a, b, c) CQD-S/AgNP and (d, e, f) CQD-P/AgNP.
